# Supplementary material for: Blood Cadmium Levels and Incident Cardiovascular Events during Follow-up in a Population-Based Cohort of Swedish Adults: The Malmö Diet and Cancer Study
Source: PubMed Central journal article supplement (PMC4858401; doi:10.1289/ehp.1509735), 2015-10-30
Supplement: ehp.1509735.s001.acco.pdf [file ehp.1509735.s001.acco.pdf]

**Note to readers with disabilities:** *EHP* strives to ensure that all journal content is accessible to all readers. However, some figures and Supplemental Material published in *EHP* articles may not conform to [508 standards](#) due to the complexity of the information being presented. If you need assistance accessing journal content, please contact [ehp508@niehs.nih.gov](mailto:ehp508@niehs.nih.gov). Our staff will work with you to assess and meet your accessibility needs within 3 working days.

## **Supplemental Material**

### **Blood Cadmium Levels and Incident Cardiovascular Events during Follow-up in a Population-Based Cohort of Swedish Adults: The Malmö Diet and Cancer Study**

Lars Barregard, Gerd Sallsten, Björn Fagerberg, Yan Borné, Margaretha Persson, Bo Hedblad, and Gunnar Engström

#### **Table of Contents**

**Table S1.** Mortality and first incident cardiovascular events (*n*) during follow-up from baseline to 2010. Number of person-years (rounded) given for each analysis.

**Table S2.** Stratified hazard ratios (95% confidence intervals) for acute coronary event comparing the 4<sup>th</sup> quartile of B-Cd with the first quartile.

**Table S3.** Hazard ratios (95% CI) for first incident cardiovascular disease event by quartiles of cadmium concentration in blood **in women and men**. Quartiles of blood cadmium are based on the total data set including both men and women. The number of events (*n*) is given for each outcome.

**Table S4.** Hazard ratios (95% CI) for first incident cardiovascular disease event by quartiles of cadmium concentration in blood (time scale=age). Model 1 and 2 as in main Table 2, but **including only those with data for all covariates in Model 3, thus resulting in the same individuals in all three models (N=4045)**. The number of events (*n*) is given for each outcome.

**Table S5.** Hazard ratios (95% CI) for first incident cardiovascular disease event by quartiles of **erythrocyte cadmium (µg/L) instead of blood cadmium in Model 2**. The number of events (*n*) is given for each outcome.

**Table S6.** Hazard ratios (95% CI) for first incident cardiovascular disease event by quartiles of cadmium concentration in blood. Model **additionally number of pack-years in participants with such data available (N=3938 out of 4819).**

**Figure S1.** Flow chart showing the recruitment of the MDC cardiovascular cohort and the study participants of the present study.

**Figure S2.** Smooth function (with 95% confidence interval) describing the impact of B-Cd on the risk of acute coronary event, in a model adjusted for age, gender, smoking, waist, education, physical activity, alcohol, triglycerides, HbA1c, and C-reactive protein (=Model 2 in Table 2 + age). Graph A shows results up to B-Cd 4  $\mu\text{g/L}$  Graph B shows results up to B-Cd 1  $\mu\text{g/L}$ . Graph C shows results up to B-Cd 1  $\mu\text{g/L}$  in women and graph D in men. Arrows indicate medians of B-Cd within quartiles.

**Table S1.** Mortality and first incident cardiovascular events (*n*) during follow-up from baseline to 2010. Number of person-years (rounded) given for each analysis.

| <b>Event</b>                              | <b>Total</b> | <b>Women</b> | <b>Men</b> |
|-------------------------------------------|--------------|--------------|------------|
| All-cause mortality                       | 882          | 417          | 465        |
| Person-years                              | 81400        |              |            |
| Cardiovascular mortality <sup>a)</sup>    | 257          | 113          | 144        |
| Person-years                              | 81400        |              |            |
| Acute coronary event                      | 377          | 146          | 231        |
| Person-years                              | 78500        |              |            |
| Acute AMI                                 | 344          | 136          | 208        |
| Death in IHD                              | 33           | 10           | 23         |
| Stroke (N)                                | 336          | 170          | 166        |
| Person-years                              | 79100        |              |            |
| Ischemic                                  | 278          | 138          | 140        |
| Other or unspecified                      | 58           | 32           | 26         |
| Major adverse cardiac event <sup>b)</sup> | 479          | 180          | 299        |
| Person-years                              | 77400        |              |            |
| CABG                                      | 162          | 59           | 103        |
| PCI                                       | 52           | 17           | 35         |

---

An individual could contribute to AMI as well as to stroke, and to incident disease as well as to mortality. **a)** ICD9: 390 – 459 or ICD10: I00 –I99 **b)** Acute MI, death in IHD, coronary artery bypass graft (CABG), percutaneous coronary intervention (PCI). Only the first major adverse cardiac event was considered here.

**Table S2.** Stratified hazard ratios (95% confidence intervals) for acute coronary event comparing the 4<sup>th</sup> quartile of B-Cd with the first quartile.<sup>a</sup>

| Subgroup                           | n events/<br>N participants | HR (95% CI       |
|------------------------------------|-----------------------------|------------------|
| <b>Age</b>                         |                             |                  |
| >60 years                          | 187/1615                    | 1.8 (1.1 , 3.1)  |
| ≤60 years                          | 141/2752                    | 1.9 (0.98 , 3.6) |
| <b>Sex</b>                         |                             |                  |
| Women                              | 128/2628                    | 1.7 (0.8 , 3.5)  |
| Men                                | 200/1739                    | 1.9 (1.1 , 3.2)  |
| <b>Smoking</b>                     |                             |                  |
| Never                              | 111/1782                    | 2.3 (1.01 , 5.1) |
| Former                             | 110/1463                    | 2.1 (1.01 , 4.2) |
| Current                            | 107/1122                    | 2.3 (0.6 , 9.3)  |
| <b>Education</b>                   |                             |                  |
| <9 years                           | 200/1974                    | 1.8 (1.04 , 3.1) |
| ≥9 years                           | 128/2393                    | 2.0 (1.03 , 3.8) |
| <b>Waist circumference (cm)</b>    |                             |                  |
| >85 cm                             | 201/1812                    | 1.9 (1.1 , 3.1)  |
| ≤85 cm                             | 127/2555                    | 1.8 (0.8 , 3.6)  |
| <b>Antihypertensive medication</b> |                             |                  |
| Yes                                | 80/665                      | 1.7 (0.8 , 3.8)  |
| No                                 | 248/3702                    | 1.9 (1.2 , 3.2)  |
| <b>Diabetes</b>                    |                             |                  |
| Yes                                | 58/333                      | 2.1 (0.8 , 5.7)  |
| No                                 | 270/4034                    | 1.8 (1.1 , 2.9)  |

a) Time scale is age, and the model is adjusted for sex, smoking, waist circumference, low education, low physical activity, alcohol intake, serum triglycerides, HbA1c, and CRP (=Model 2 in main Table 2).

**Table S3.** Hazard ratios (95% CI) for first incident cardiovascular disease event by quartiles of cadmium concentration in blood **in women and men**<sup>a</sup>. Quartiles of blood cadmium are based on the total data set including both men and women. The number of events (n) is given for each outcome.

|                                    | Quartiles of blood cadmium |                |                 |                 | P for inter-action |
|------------------------------------|----------------------------|----------------|-----------------|-----------------|--------------------|
|                                    | 1                          | 2              | 3               | 4               |                    |
| <b>Acute coronary event</b>        |                            |                |                 |                 | 0.84               |
| (AMI + death in IHD)               |                            |                |                 |                 |                    |
| Women (n=128)                      | 1.0                        | 1.2 (0.7, 2.1) | 1.3 (0.7, 2.3)  | 1.7 (0.8, 3.5)  |                    |
| Men (n=200)                        | 1.0                        | 1.1 (0.8, 1.8) | 1.4 (0.9, 2.1)  | 1.9 (1.1, 3.2)  |                    |
| <b>Acute myocardial infarction</b> |                            |                |                 |                 | 0.85               |
| Women (n=121)                      | 1.0                        | 1.2 (0.7, 2.3) | 1.3 (0.7, 2.3)  | 1.6 (0.8, 3.4)  |                    |
| Men (n=184)                        | 1.0                        | 1.2 (0.7, 1.8) | 1.3 (0.9, 2.1)  | 1.8 (1.1, 3.2)  |                    |
| <b>Major adverse cardiac event</b> |                            |                |                 |                 | 0.51               |
| Women (n=161)                      | 1.0                        | 1.5 (0.8, 2.6) | 1.9 (1.1, 3.3)  | 2.3 (1.2, 4.5)  |                    |
| Men (n=261)                        | 1.0                        | 1.2 (0.8, 1.7) | 1.4 (0.97, 2.0) | 1.7 (1.1, 2.7)  |                    |
| <b>Any stroke</b>                  |                            |                |                 |                 | 0.02               |
| Women (n=147)                      | 1.0                        | 1.0 (0.6, 1.9) | 1.5 (0.9, 2.5)  | 2.8 (1.5, 5.4)  |                    |
| Men (n=147)                        | 1.0                        | 1.0 (0.6, 1.6) | 0.7 (0.4, 1.2)  | 1.5 (0.8, 2.8)  |                    |
| <b>Ischemic stroke</b>             |                            |                |                 |                 | 0.007              |
| Women (n=117)                      | 1.0                        | 1.1 (0.6, 2.2) | 1.7 (0.9, 3.2)  | 3.1 (1.5, 6.5)  |                    |
| Men (n=123)                        | 1.0                        | 0.9 (0.6, 1.5) | 0.6 (0.3, 1.04) | 1.6 (0.8, 3.0)  |                    |
| <b>All-cause mortality</b>         |                            |                |                 |                 | 0.68               |
| Women (n=364)                      | 1.0                        | 1.0 (0.7, 1.4) | 1.0 (0.7, 1.4)  | 1.8 (1.2, 2.7)  |                    |
| Men (n=407)                        | 1.0                        | 1.0 (0.7, 1.4) | 1.1 (0.8, 1.5)  | 1.5 (1.03, 2.1) |                    |
| <b>Cardiovascular mortality</b>    |                            |                |                 |                 | 0.06               |
| Women (n=95)                       | 1.0                        | 1.0 (0.5, 1.9) | 1.1 (0.5, 2.1)  | 2.6 (1.2, 5.7)  |                    |
| Men (n=120)                        | 1.0                        | 1.5 (0.9, 2.7) | 1.8 (1.05, 3.1) | 1.6 (0.8, 3.1)  |                    |

a) Model adjusted for smoking, waist circumference, low education, low physical activity, alcohol intake, serum triglycerides, HbA1c, CRP (=Model 2 in main Table 2).

**Table S4.** Hazard ratios (95% CI) for first incident cardiovascular disease event by quartiles of cadmium concentration in blood (time scale=age). Model 1 and 2 as in main Table 2, but **including only those with data for all covariates in Model 3, thus resulting in the same individuals in all three models (N=4045).** The number of events (n) is given for each outcome.

|                                                     | <b>Quartiles of blood cadmium</b> |                  |                  |                 |
|-----------------------------------------------------|-----------------------------------|------------------|------------------|-----------------|
|                                                     | <b>1</b>                          | <b>2</b>         | <b>3</b>         | <b>4</b>        |
| <b>Acute coronary event</b><br>(AMI + death in IHD) |                                   |                  |                  |                 |
| Model 1 (n=306)                                     | 1.0                               | 1.0 (0.7 , 1.4)  | 1.2 (0.9 , 1.7)  | 2.1 (1.5 , 2.8) |
| Model 2 (n=306)                                     | 1.0                               | 1.0 (0.7 , 1.4)  | 1.2 (0.8 , 1.7)  | 1.9 (1.2 , 2.8) |
| Model 3 (n=306)                                     | 1.0                               | 1.0 (0.7 , 1.4)  | 1.2 (0.8 , 1.6)  | 1.9 (1.2 , 2.9) |
| <b>Acute myocardial infarction</b>                  |                                   |                  |                  |                 |
| Model 1 (n=283)                                     | 1.0                               | 1.0 (0.7 , 1.4)  | 1.2 (0.8 , 1.6)  | 2.0 (1.4 , 2.7) |
| Model 2 (n=283)                                     | 1.0                               | 1.0 (0.7 , 1.5)  | 1.1 (0.8 , 1.7)  | 2.0 (1.3 , 2.9) |
| Model 3 (n=283)                                     | 1.0                               | 1.0 (0.7 , 1.5)  | 1.1 (0.8 , 1.6)  | 1.8 (1.2 , 2.8) |
| <b>Major adverse cardiac event</b>                  |                                   |                  |                  |                 |
| Model 1 (n=394)                                     | 1.0                               | 1.1 (0.8 , 1.5)  | 1.4 (1.04 , 1.9) | 2.1 (1.6 , 2.8) |
| Model 2 (n=394)                                     | 1.0                               | 1.1 (0.8 , 1.5)  | 1.4 (1.03 , 1.9) | 1.9 (1.3 , 2.8) |
| Model 3 (n=394)                                     | 1.0                               | 1.1 (0.9 , 1.5)  | 1.4 (1.04 , 1.9) | 1.9 (1.3 , 2.8) |
| <b>Any stroke</b>                                   |                                   |                  |                  |                 |
| Model 1 (n=271)                                     | 1.0                               | 0.9 (0.6 , 1.2)  | 1.0 (0.7 , 1.4)  | 1.9 (1.4 , 2.7) |
| Model 2 (n=271)                                     | 1.0                               | 0.9 (0.6 , 1.3)  | 1.0 (0.7 , 1.4)  | 2.1 (1.3 , 3.2) |
| Model 3 (n=271)                                     | 1.0                               | 0.8 (0.6 , 1.2)) | 0.9 (0.7 , 1.4)  | 2.1 (1.3 , 3.2) |
| <b>Ischemic stroke</b>                              |                                   |                  |                  |                 |
| Model 1 (n=224)                                     | 1.0                               | 0.9 (0.6 , 1.3)  | 0.9 (0.6 , 1.3)  | 2.0 (1.4 , 2.8) |
| Model 2 (n=224)                                     | 1.0                               | 0.9 (0.6 , 1.3)  | 0.9 (0.6 , 1.4)  | 2.1 (1.3 , 3.3) |
| Model 3 (n=224)                                     | 1.0                               | 0.8 (0.6 , 1.2)) | 0.9 (0.6 , 1.4)  | 2.1 (1.3 , 3.3) |
| <b>All-cause mortality</b>                          |                                   |                  |                  |                 |
| Model 1 (n=718)                                     | 1.0                               | 1.0 (0.8 , 1.3)  | 1.1 (0.9 , 1.4)  | 2.2 (1.8 , 2.7) |
| Model 2 (n=718)                                     | 1.0                               | 1.0 (0.8 , 1.3)  | 1.0 (0.8 , 1.3)  | 1.7 (1.3 , 2.2) |
| Model 3 (n=718)                                     | 1.0                               | 1.0 (0.8 , 1.3)  | 1.0 (0.8 , 1.3)  | 1.6 (1.3 , 2.2) |
| <b>Cardiovascular mortality</b>                     |                                   |                  |                  |                 |
| Model 1 (n=206)                                     | 1.0                               | 1.3 (0.8 , 2.0)  | 1.5 (0.97 , 2.3) | 2.5 (1.7 , 2.8) |
| Model 2 (n=206)                                     | 1.0                               | 1.3 (0.8 , 2.0)  | 1.4 (0.9 , 2.2)  | 1.9 (1.1 , 3.2) |
| Model 3 (n=206)                                     | 1.0                               | 1.2 (0.8 , 1.9)  | 1.3 (0.9 , 2.1)  | 1.9 (1.1 , 3.2) |

**Table S5.** Hazard ratios (95% CI) for first incident cardiovascular disease event by quartiles of erythrocyte cadmium ( $\mu\text{g/L}$ ) instead of blood cadmium in Model 2.<sup>a)</sup> The number of events (n) is given for each outcome.

|                                                                                            | Quartiles of erythrocyte cadmium |                 |                  |                 |
|--------------------------------------------------------------------------------------------|----------------------------------|-----------------|------------------|-----------------|
|                                                                                            | 1                                | 2               | 3                | 4               |
| <b>Mean</b>                                                                                | 0.31                             | 0.52            | 0.85             | 2.8             |
| <b>Range</b>                                                                               | 0.06 – 0.414                     | >0.41 – 0.633   | >0.633 – 1.21    | >1.21 – 11.3    |
| <b>Acute coronary event<sup>b)</sup><br/>(n=328, sample 4367)<br/>(AMI + death in IHD)</b> | 1.0                              | 1.1 (0.8 , 1.5) | 1.5 (1.04 , 2.1) | 1.8 (1.2 , 2.7) |
| <b>Acute myocardial infarction (n=305, sample 4367)</b>                                    | 1.0                              | 1.1 (0.8 , 1.6) | 1.5 (1.04 , 2.1) | 1.7 (1.1 , 2.7) |
| <b>Major adverse cardiac event (n=422, sample 4350)</b>                                    | 1.0                              | 1.2 (0.9 , 1.6) | 1.6 (1.2 , 2.2)  | 1.7 (1.2 , 2.5) |
| <b>Any stroke (n=294, sample 4404)</b>                                                     | 1.0                              | 0.8 (0.6 , 1.2) | 0.9 (0.6 , 1.2)  | 1.8 (1.2 , 2.7) |
| <b>Ischemic stroke (n=240, sample size 4416)</b>                                           | 1.0                              | 0.8 (0.5 , 1.2) | 0.8 (0.6 , 1.2)  | 1.8 (1.1 , 2.8) |
| <b>All-cause mortality (n=771, sample size 4437)</b>                                       | 1.0                              | 0.9 (0.7 , 1.1) | 1.0 (0.8 , 1.2)  | 1.5 (1.2 , 1.9) |
| <b>Cardiovascular mortality (n=215, sample size 4437)</b>                                  | 1.0                              | 1.0 (0.7 , 1.6) | 1.3 (0.9 , 1.9)  | 1.5 (0.9 , 2.5) |

a) Model adjusted for sex, smoking, waist circumference, low education, low physical activity, alcohol intake, serum triglycerides, HbA1c, and CRP (=Model 2 in main Table 2).

b) ICD9: 410, 412, or 414 or ICD10: I21, I22, I23, or I25.

**Table S6.** Hazard ratios (95% CI) for first incident cardiovascular disease event by quartiles of cadmium concentration in blood.<sup>a)</sup> Model **additionally number of pack-years<sup>b)</sup> in participants with such data available (N=3938 out of 4819).**

|                                                                           | Quartiles of blood cadmium |                 |                  |                 |
|---------------------------------------------------------------------------|----------------------------|-----------------|------------------|-----------------|
|                                                                           | 1                          | 2               | 3                | 4               |
| <b>Acute coronary event (n=253)</b><br>(AMI + death in IHD) <sup>c)</sup> | 1.0                        | 1.0 (0.7 , 1.5) | 1.2 (0.8 , 1.8)  | 1.8 (1.1, 2.9)  |
|                                                                           |                            |                 |                  |                 |
| <b>Acute myocardial infarction (n=238)</b>                                | 1.0                        | 1.1 (0.7 , 1.6) | 1.2 (0.8 , 1.8)  | 1.8 (1.1 , 3.1) |
|                                                                           |                            |                 |                  |                 |
| <b>Major adverse cardiac event (n=332)</b>                                | 1.0                        | 1.1 (0.8 , 1.6) | 1.4 (0.99 , 2.0) | 1.8 (1.1 , 2.7) |
|                                                                           |                            |                 |                  |                 |
| <b>Any stroke (n=232)</b>                                                 | 1.0                        | 0.9 (0.6 , 1.3) | 1.1 (0.7 , 1.6)  | 2.0 (1.2 , 3.4) |
|                                                                           |                            |                 |                  |                 |
| <b>Ischemic stroke (n=187)</b>                                            | 1.0                        | 0.8 (0.5 , 1.3) | 1.0 (0.6 , 1.5)  | 2.0 (1.1 , 3.6) |
|                                                                           |                            |                 |                  |                 |
| <b>All-cause mortality (n=506)</b>                                        | 1.0                        | 1.0 (0.7 , 1.3) | 0.9 (0.7 , 1.3)  | 1.5 (1.01 ,2.1) |
|                                                                           |                            |                 |                  |                 |
| <b>Cardiovascular mortality (n=140)</b>                                   | 1.0                        | 1.1 (0.7 , 2.0) | 1.1 (0.6 , 1.9)  | 1.9 (0.9 , 3.8) |

**a)** Model adjusted for sex, smoking, waist circumference, low education, low physical activity, alcohol intake, serum triglycerides, HbA1c, CRP (=Model 2 in main Table 2), and pack-years.

**b)** Pack-years were categorized in five categories, one for never-smokers and four based on quartiles among ever-smokers. Category 1: 0 pack-years, Category 2: >0 but <7.5 pack-years, Category 3: ≥7.5 but <17 pack-years, Category 4: ≥17 but <30 pack-years, and Category 5: ≥30 pack-years.

**c)** ICD9: 410, 412, or 414 or ICD10: I21, I22, I23, or I25.



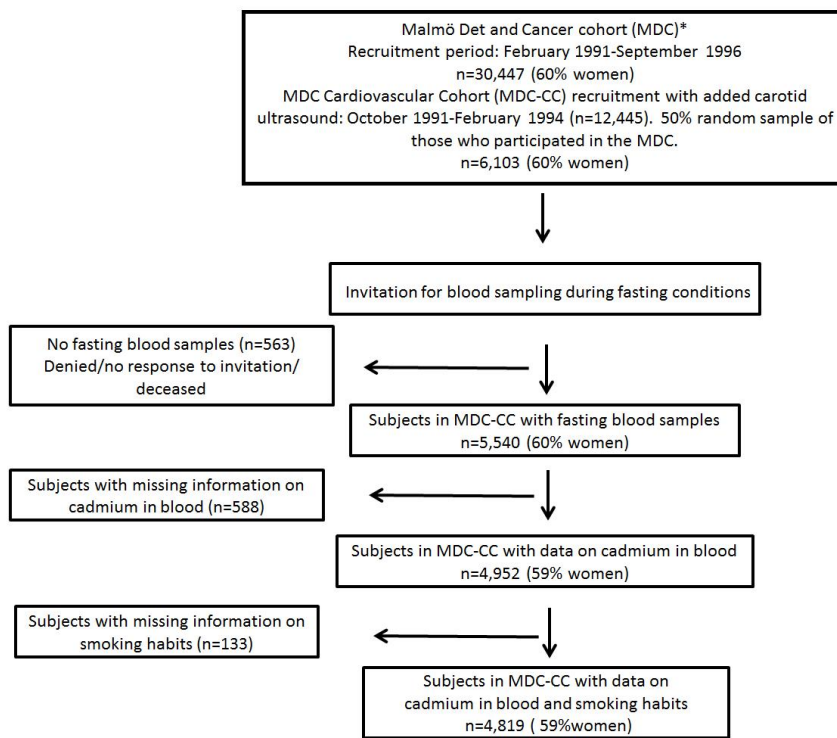

\*1. Manjer J, Elmståhl S, Janzon L, Berglund G. Invitation to a population-based cohort study: differences between subjects recruited using various strategies. *Scand J Public Health.* 2002;30(2):103-12.  
 2. Manjer J, Carlsson S, Elmståhl S, Gullberg B, Janzon L, Lindström M, Mattisson I, Berglund G. The Malmö Diet and Cancer Study: representativity, cancer incidence and mortality in participants and non-participants. *Eur J Cancer Prev.* 2001 Dec;10(6):489-99.

**Figure S1.** Flow chart showing the recruitment of the MDC cardiovascular cohort and the study participants of the present study.

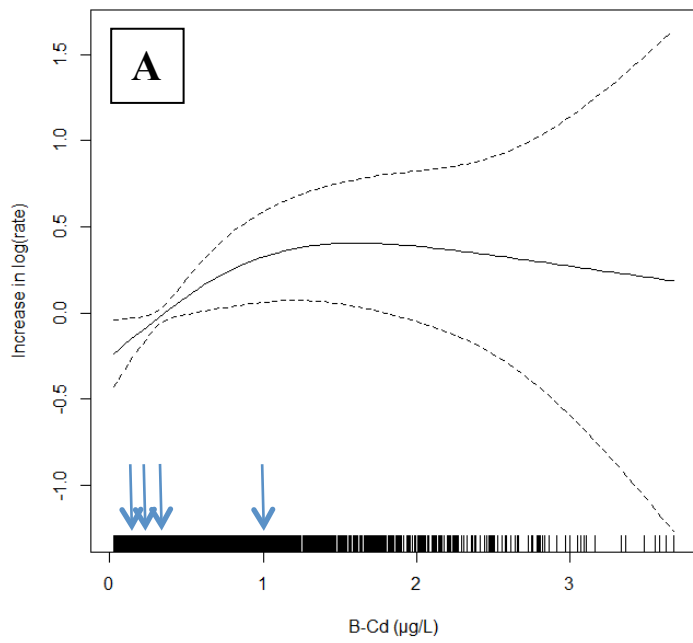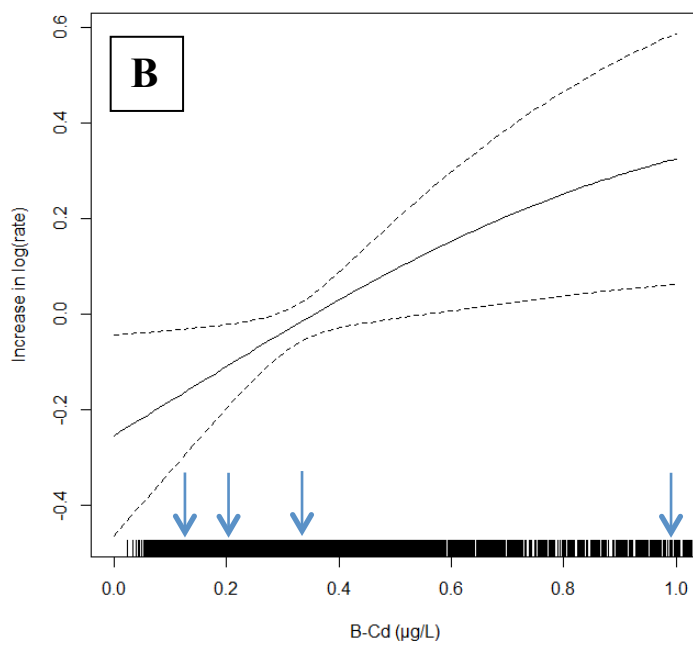

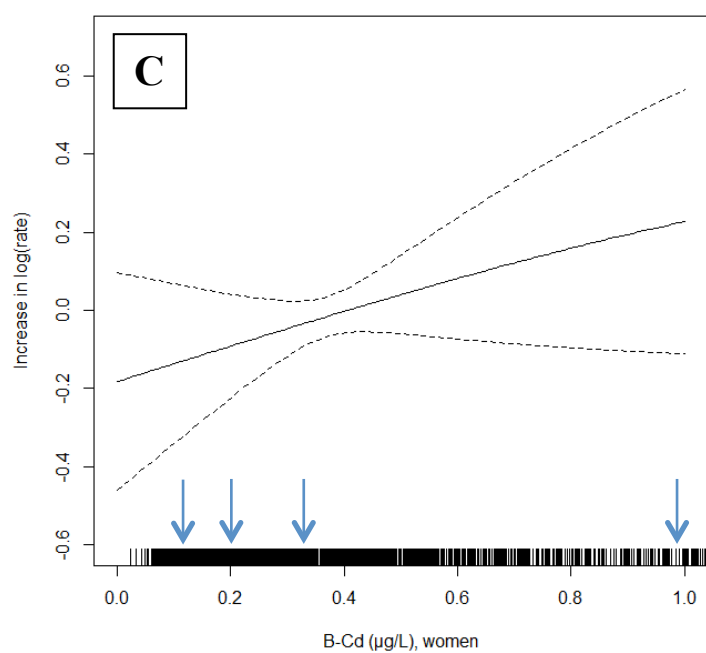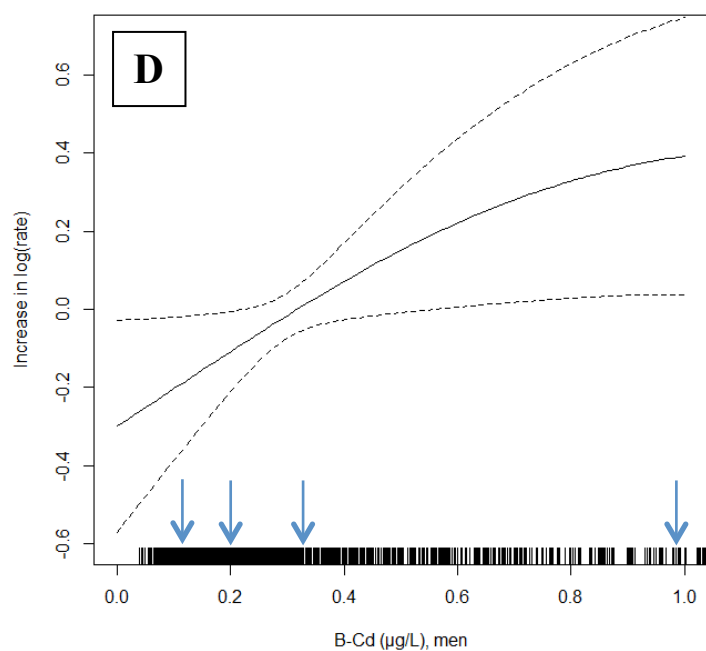

**Figure S2.** Smooth function (with 95% confidence interval) describing the impact of B-Cd on the risk of acute coronary event, in a model adjusted for age, gender, smoking, waist, education, physical activity, alcohol, triglycerides, HbA1c, and C-reactive protein (=Model 2 in Table 2 + age). Graph A shows results up to B-Cd 4  $\mu\text{g/L}$  Graph B shows results up to B-Cd 1  $\mu\text{g/L}$ . Graph C shows results up to B-Cd 1  $\mu\text{g/L}$  in women and graph D in men. Arrows indicate medians of B-Cd within quartiles.
